# Supplementary material
Source: PubMed Central journal article supplement (PMC10245503)
Supplement: 44158_2022_63_MOESM1_ESM.pdf [file 44158_2022_63_MOESM1_ESM.pdf]

## Survey on the nutritional practices of critically ill, COVID-19 patients

**For more than a year and a half, the SARS-Cov-2 pandemic has been giving a tremendous strain on the organizational and care resilience of health care systems around the world and, consequently, on the lives of millions of people.**

**Italy was the first Western country to be affected by the pandemic. In April 2020, during the first wave, more than 28,000 patients were admitted to Italian hospitals, and more than 3,500 of them were in intensive care units.**

**SARS-Cov-2 syndrome, which in about 10-15% of cases manifests as severe illness, in 5-7% of cases requires intensive care unit admission for severe respiratory failure.**

**The characteristics of patients admitted to the ICU (elderly, with comorbidities, malnourished), coupled with the severity of conditions resulting from SARS-Cov-2 syndrome, should lead clinicians to consider nutritional support as an integral part of the therapeutic approach in the ICU setting. The indication for nutritional therapy, in fact, aims for the prevention and modulation of the effects which critical illness causes on nutritional and metabolic status, as well as to alleviate the malnutrition status, often present in the majority of Covid-19 patients.**

**To make a contribution to this issue, SIAARTI is conducting an exploratory survey on the nutritional strategies of critically ill patients admitted to the ICU with severe forms of Covid-19; we aim to understand how the nutritional status of the critically ill patients is addressed by Italian intensivists.**

1. The ICU in which you work has admitted patients with COVID-19?

Yes

No

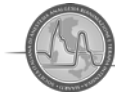

## Survey on the nutritional practices of critically ill, COVID-19 patients

2. Insert your e-mail address:

\* 3. What is your genre:

- M  
 F  
 Prefer not to say

\* 4. What is your age:

\* 5. When did you complete your post-graduate Antesthesia and Intensive Care program?

\* 6. Which Region do you work in:

\* 7. Which city o you work in:

\* 8. Which type of Hospital do you work in

- General Hospital  
 Teaching Hospital  
 Private research Hospital  
 Public research Hospital  
 Religious Hospital  
 University-owned Hospital  
 Other (specify)

\* 9. Write the name of the Hospital you work in:

\* 10. What type of ICU do you work in

- General ICU
- COVID-19 cohort ICU
- Neuro-ICU
- Cardiac ICU
- Postoperative ICU
- Pediatric ICU

\* 11. In your ICU, who is in charge for the management of nutrition support:

- Intensivist
- Clinical nutrition specialist

\* 12. What tool for the nutritional screening do you use:

|                           | Yes                   | No                    |
|---------------------------|-----------------------|-----------------------|
| ESPEN guidelines          | <input type="radio"/> | <input type="radio"/> |
| Scores (Nutric, NRS-2002) | <input type="radio"/> | <input type="radio"/> |
| Weight                    | <input type="radio"/> | <input type="radio"/> |
| BMI                       | <input type="radio"/> | <input type="radio"/> |
| Other (specify)           | <input type="text"/>  |                       |

\* 13. How do you assess protein and calorie needs?

|                                                 | Yes                   | No                    |
|-------------------------------------------------|-----------------------|-----------------------|
| Indirect calorimetry                            | <input type="radio"/> | <input type="radio"/> |
| Equations<br>(Es. Harris-Benedict)              | <input type="radio"/> | <input type="radio"/> |
| ESPEN guidelines<br>suggestion (eg. 25 kcal/kg) | <input type="radio"/> | <input type="radio"/> |
| Other (specify)                                 | <input type="text"/>  |                       |

\* 14. When do you start nutrition support from the moment in which the patient is clinically stable?

- 0-24 h
- 25-48 h
- Beyond 48 h

\* 15. Which route of nutrition support do you use preferentially to reach the calorie and protein target?

- Parenteral
- Enteral
- Mixed

\* 16. How much time do you take to reach the nutritional target set upon admission, for an average critically-ill patient?

|                   | COVID-19                 | NON COVID-19             |
|-------------------|--------------------------|--------------------------|
| 4-7 days          | <input type="checkbox"/> | <input type="checkbox"/> |
| 7-14 days         | <input type="checkbox"/> | <input type="checkbox"/> |
| More than 14 days | <input type="checkbox"/> | <input type="checkbox"/> |

\* 17. Which of the following tools do you preferentially use to reach the nutritional targets in case of intolerance to enteral nutrition:

- Prokinetic drugs independently of the level of Gastric residual volume (GRV)
- Prokinetic drugs with a threshold of GRV
- Supplementary parenteral nutrition
- Total parenteral nutrition
- Post-pyloric feeding
- Prokinetics and parenteral nutrition

\* 18. How often do you perform the nitrogen balance in critically ill patients?

- On a daily basis for the whole duration of ICU stay
- On a daily basis for the first week
- Less than daily
- No

\* 19. Which of the following enteral formulae are used in the first week of ICU stay in the critically-ill COVID-19 patient:

- Standard, isocaloric formula
- Individualized formula
- Not specified

\* 20. Which of the following parenteral formulations are used in the first week of ICU stay in the critically-ill COVID-19 patient:

- Standard, commercially-available formulation
- Special formulation
- Formulation individually prescribed by a clinical nutrition specialist
- Not specified

\* 21. Are nutritional problems reported in ICU the discharge summary?

- Yes
- No

\* 22. What type of nutritional support is prescribed to patients after resolution of the acute phase of illness?

- Oral nutritional supplements
- Ongoing enteral nutrition
- Ongoing parenteral nutrition
- Not indicated

\* 23. Do you use any validate scale for the functional assessment of critically ill patients?

- Yes
- No

If yes, please specify

\* 24. How do you assess lean body mass and monitor the nutritional status of the critically ill patient?

Bioimpedentiometry

Muscle ultrasound

Urinary nitrogen

Other (specify)
